# Supplementary material for: Translational control by maternal Nanog promotes oogenesis and early embryonic development
Source: Oxford University Press journal article supplement (doi:10.1242/dev.201213), 2022-12-15
Supplement: dev201213supp.pdf [file dev201213supp.pdf]

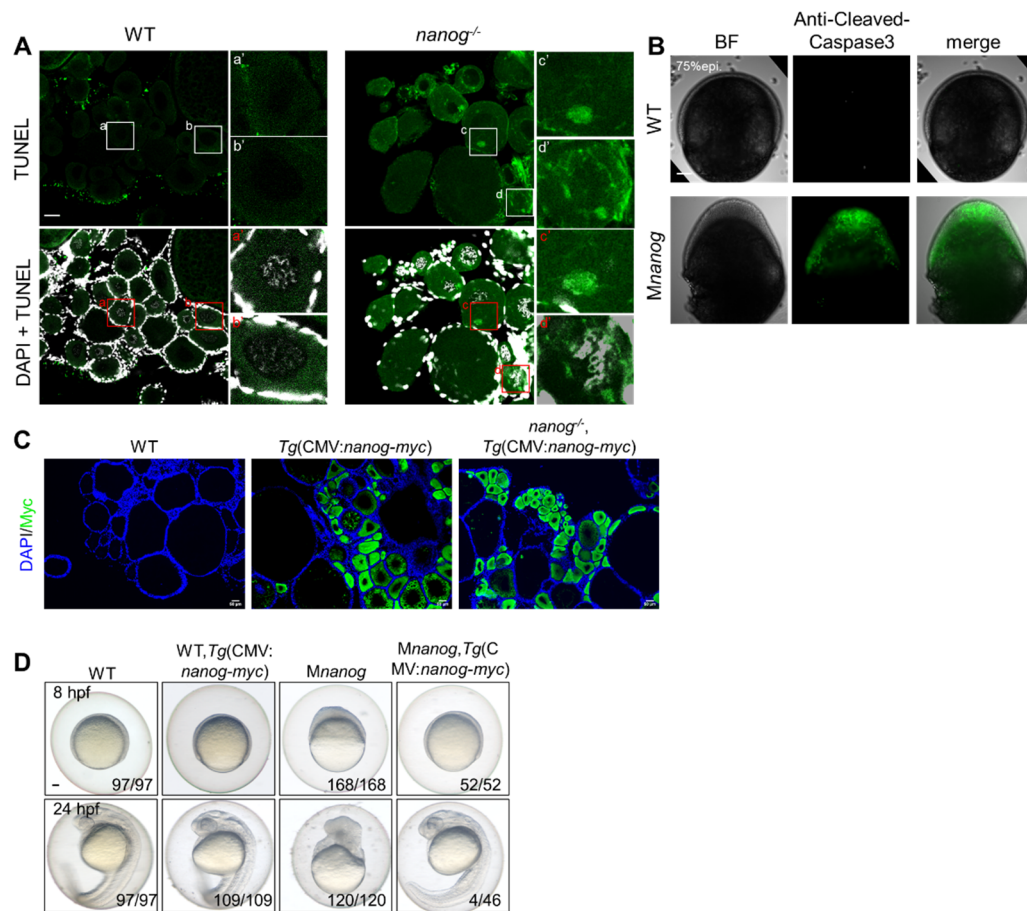

**Fig. S1. Loss of *nanog* induced apoptosis in oocyte and early embryo.** (A) TUNEL staining of ovary sections of WT and *nanog*<sup>-/-</sup> adult fish. Obvious apoptotic signals are observed in Balbiani bodies and mitochondria in *nanog*<sup>-/-</sup> (c,d), but not WT (a,b). a' and b', enlarged regions of a and b; c' and d', enlarged regions of c and d. Scale bar, 100 μm. (B) Immunostaining of active-Caspase3 in WT and *Mnanog* embryos at 75% epiboly. Robust active-caspase3 expression was detected in *Mnanog* embryo. Scale bar, 100 μm. (C) Detection of Nanog expression in ovary of WT, *Tg(CMV:nanog-myc)* with WT background, and *Tg(CMV:nanog-myc)* with *nanog*<sup>-/-</sup> background using anti-Myc antibody. DAPI was co-stained for DNA. Scale bar, 50 μm. (D) Phenotype comparison of WT, WT, *Tg(CMV:nanog-myc)*, *Mnanog* and *Mnanog, Tg(CMV:nanog-myc)* embryos at 8 and 24 hpf. Scale bar, 100 μm.

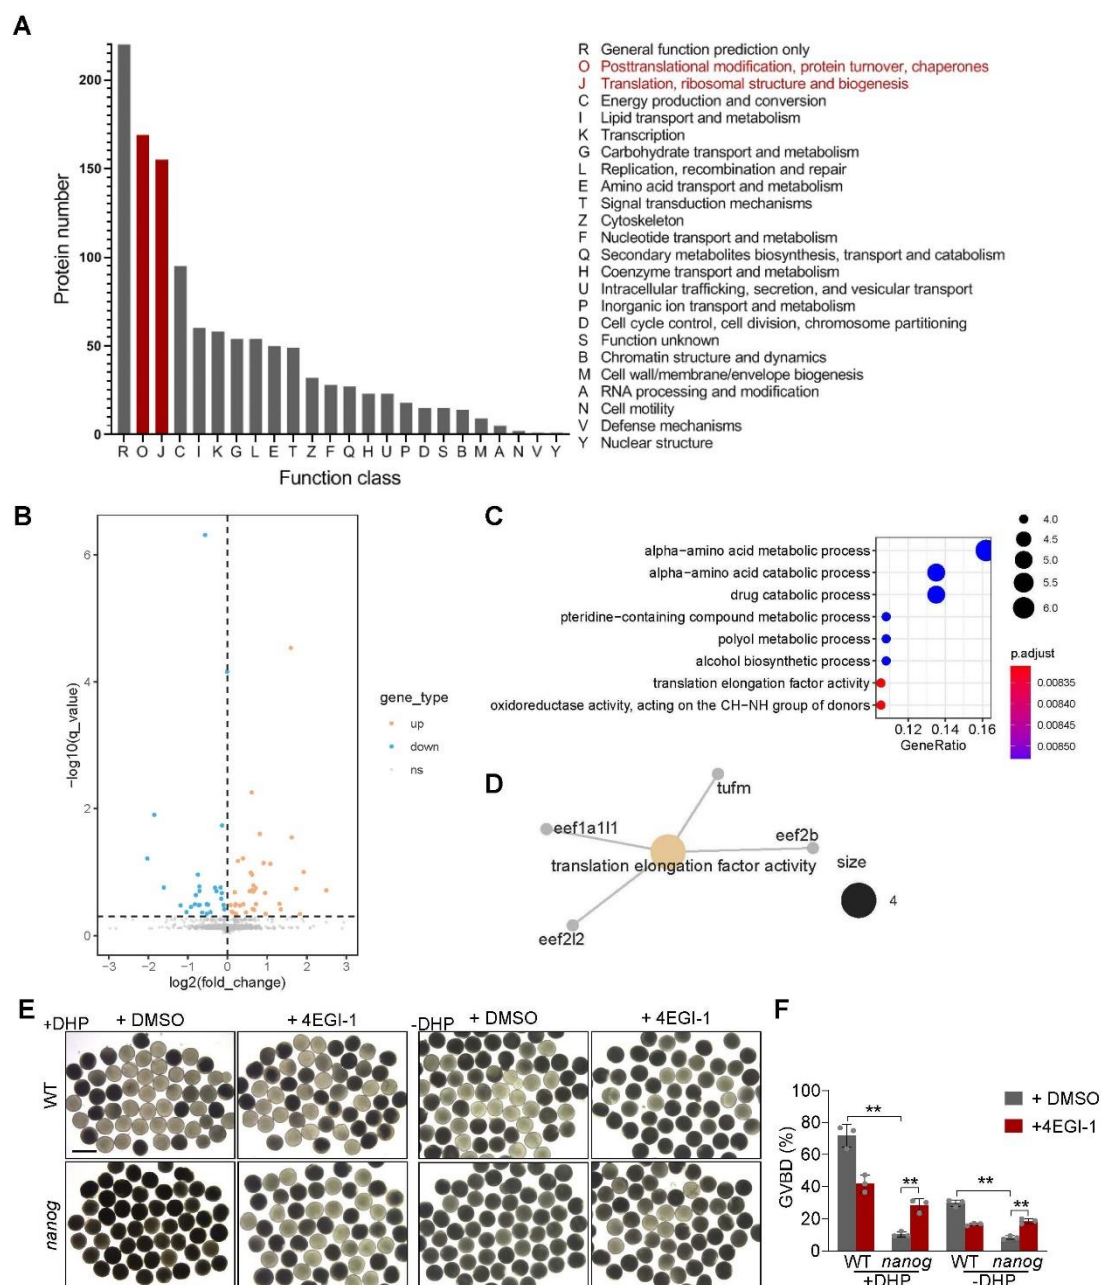

**Fig. S2. Loss of *nanog* elevates global translation level.** (A) Functional classification of the proteins identified in WT and *nanog* mutant eggs. The two most significant enriched categories which are related with translation were highlighted in red. (B) Volcano plot of upregulated and down-regulated proteins in *nanog* mutant egg. (C) GO analysis of upregulated proteins of *nanog* mutant. (D) Genes of translation elongation factors were enriched by Gene-Concept

Network analysis. (E) Morphology of stage IV follicles dissected from WT and *nanog*<sup>-/-</sup> ovaries and treated with or without 4EGI-1 (25ng/μL) in the present or absent of DHP after 2h incubation. 1μg/mL DHP was added to promote oocyte maturation. Scale bar, 1mm. (F) %GVBD comparison in WT and *nanog* mutant follicles treated with 4EGI-1. \*\**P*<0.01.

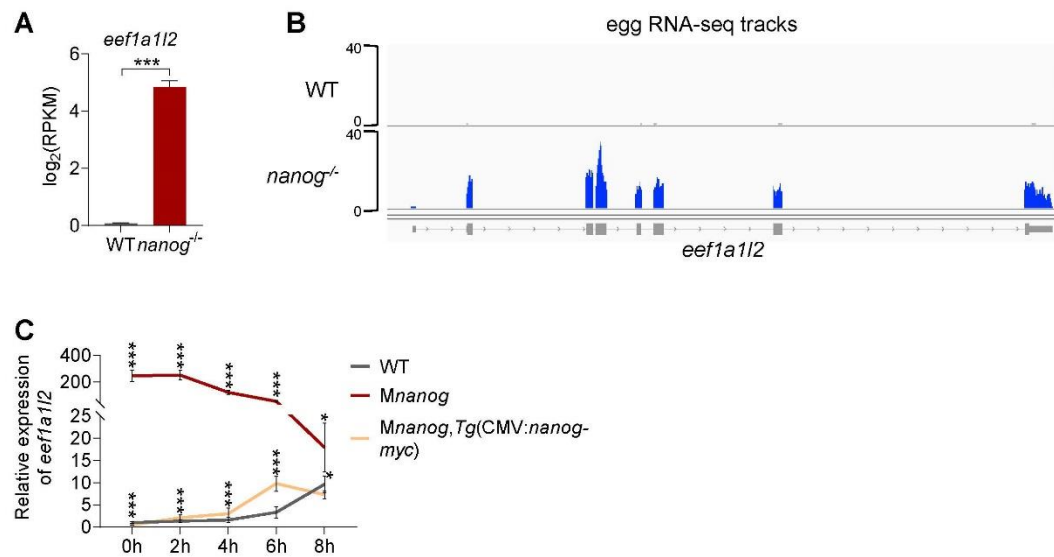

**Fig. S3. *eef1a1/2* transcription level is significantly upregulated in *nanog* mutant.** (A) FPKM values of *eef1a1/2* expression in WT and *nanog* mutant eggs. \*\*\* $P<0.001$ . (B) RNA-Seq reads mapped to *eef1a1/2* gene. Coverage tracks are displayed for WT and *nanog* mutant egg. (C) RT-qPCR analysis of *eef1a1/2* expression in WT and *Mnanog* embryos at 0, 2, 4, 6, 8 hpf. \* $P<0.05$ , \*\*\* $P<0.001$ .

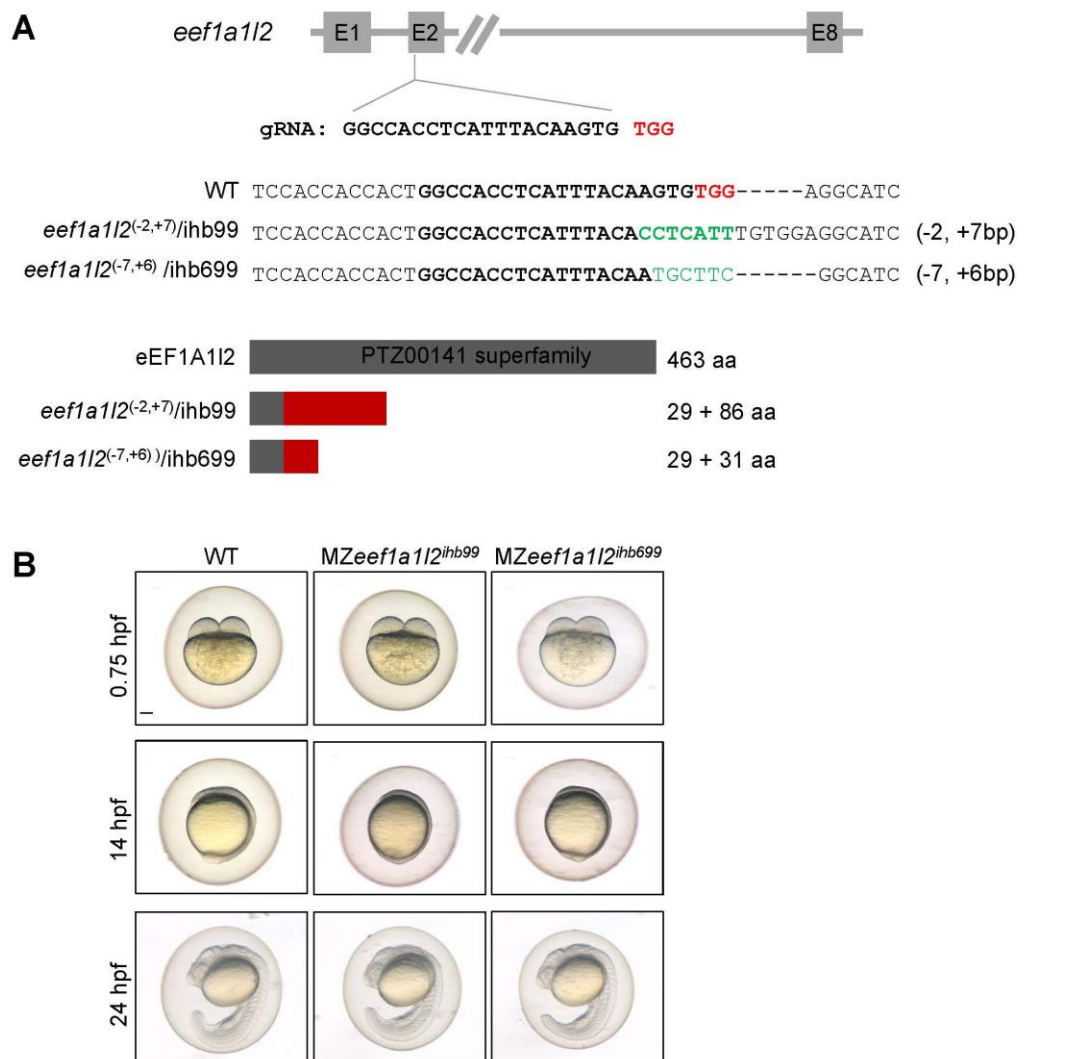

**Fig. S4. Generation of the *eef1a1/2* mutant allele using CRISPR/Cas9.** (A) Top: the gRNA target site within the exon 2. Grey boxes and connecting lines represent the exons and introns, respectively. Middle: sequence of WT and *eef1a1/2* mutant alleles near the gRNA target site (bold). PAM sequence is in red, and the insert sequence in mutant alleles is in green. Two types of mutants, (-7, +6)/ihb99 and (-2, +7)/ihb699 were screened. Bottom: domain of eEF1A1I2 protein and predicted mutant protein. Grey box indicates truncated WT eEF1A1I2 protein, and red box indicate mutant protein by frameshift. (B) Phenotype of WT, MZeef1a1/2<sup>ihb99</sup>, and MZeef1a1/2<sup>ihb699</sup> embryos at 0.75, 14, and 24 hours post-fertilization (hpf). Scale bar, 100  $\mu$ m.

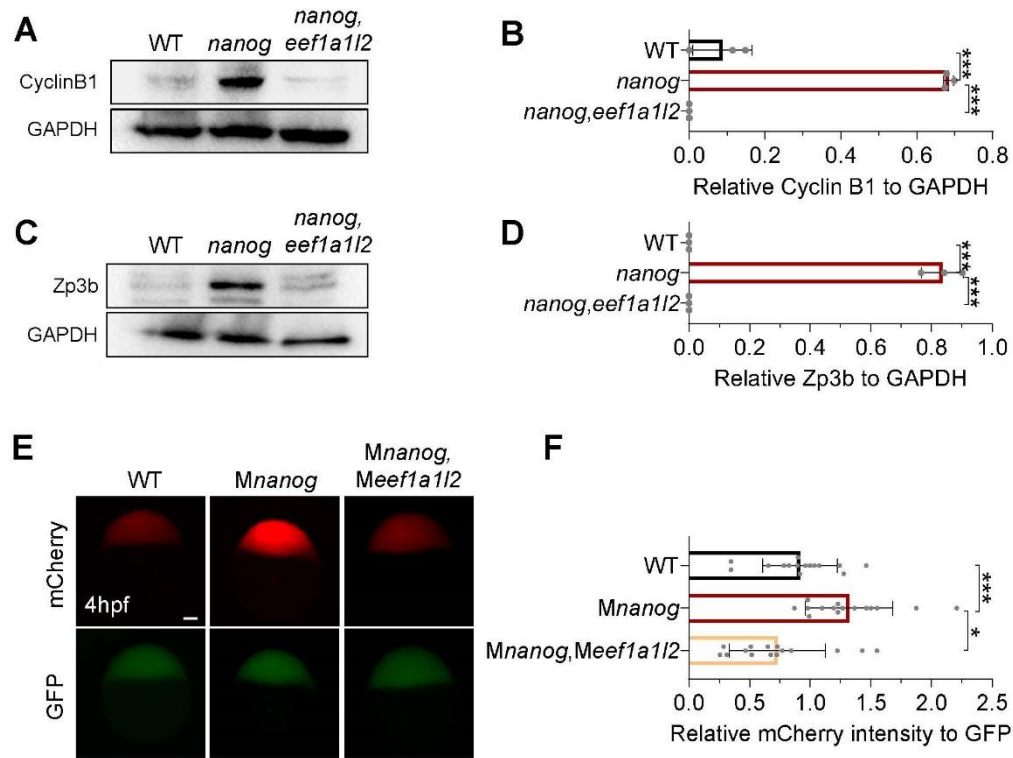

**Fig. S5. Translation level evaluation of *nanog* and *eef1a1/2* double mutant.**

(A) Western blot analysis of Cyclin B1 in WT, *nanog* mutant, and *nanog,eef1a1/2* double mutant follicles at stage I/II. (B) Comparison of Cyclin B1 intensity in panel A. \*\*\* $P < 0.001$ . (C) Western blot analysis of Zp3b in WT, *nanog* mutant, and *nanog,eef1a1/2* double mutant follicles at stage I/II. (D) Comparison of Zp3b intensity in panel B. \*\*\* $P < 0.001$ . (E) Fluorescent images showing mCherry reporter levels with GFP protein control levels in WT, *Mnanog* and *Mnanog,Meef1a1/2* embryos at 4hpf. Scale bar, 100 $\mu$ m. (F) Measurement of mCherry reporter intensities relative to GFP in panel A. \*\* $P < 0.01$ . n=15.

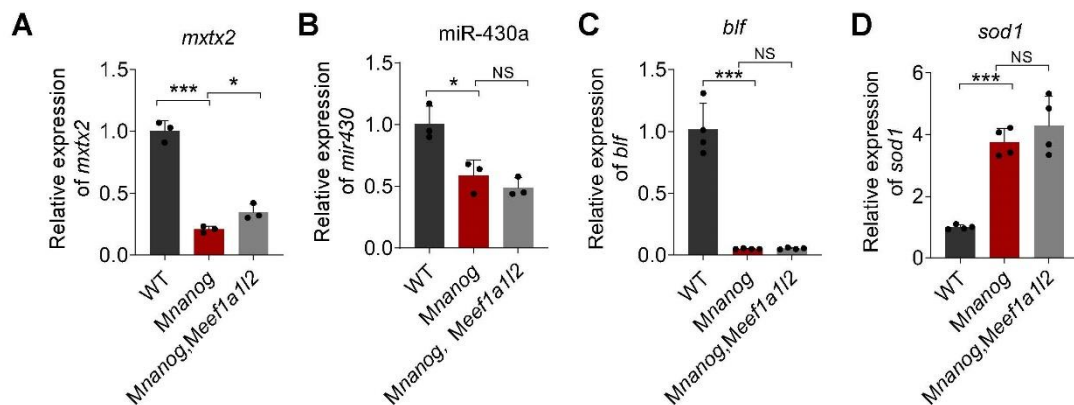

**Fig. S6. Phenotype analysis of *nanog* and *eef1a1/2* double mutant.** (A-D)

RT-PCR analysis of *mxtx2*, miR-430, *blf* and *sod1* in WT, *Mnanog* and *Mnanog,Meef1a1/2* embryos. *mxtx2* and miR-430a were analyzed at 4 hpf, *blf* and *sod1* were analyzed at 6 hpf. \* $P < 0.05$ , \*\*\* $P < 0.001$ . NS means no significant difference.

**Table S1. Differential proteins between *nanog* mutant and WT eggs.**

[Click here to download Table S1](#)

**Table S2. Primers used in qRT-PCR and mutant screening.**

[Click here to download Table S2](#)



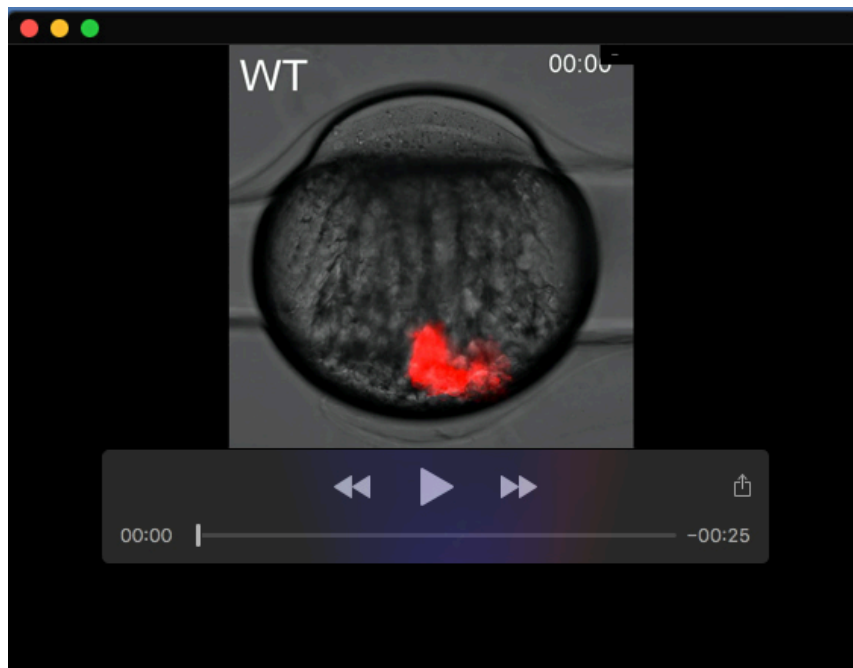

**Movie 1. Cytoplasmic movement in a WT embryo.** CM-Dil dye was injected at 20 mpf and embryos were imaged from 35 mpf to 55 mpf. The cytoplasmic streaming that transports CM-Dil dye to the animal pole can be visualized. 10 embryos were observed and this movie shows the representative result.

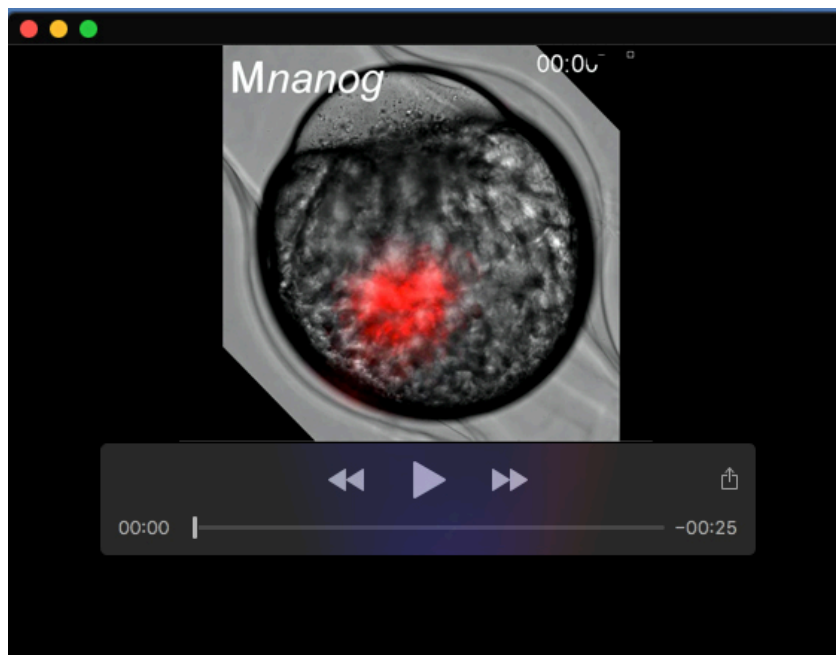

**Movie 2. Cytoplasmic movement in an *Mnanog* embryo.** CM-Dil dye was injected at 20 mpf and embryos were imaged from 40 mpf to 60 mpf. The CM-Dil dye remains stagnant in the yolk until 60 mpf, indicating cytoplasmic movement defect in *Mnanog*. 10 embryos were observed and this movie shows the representative result.



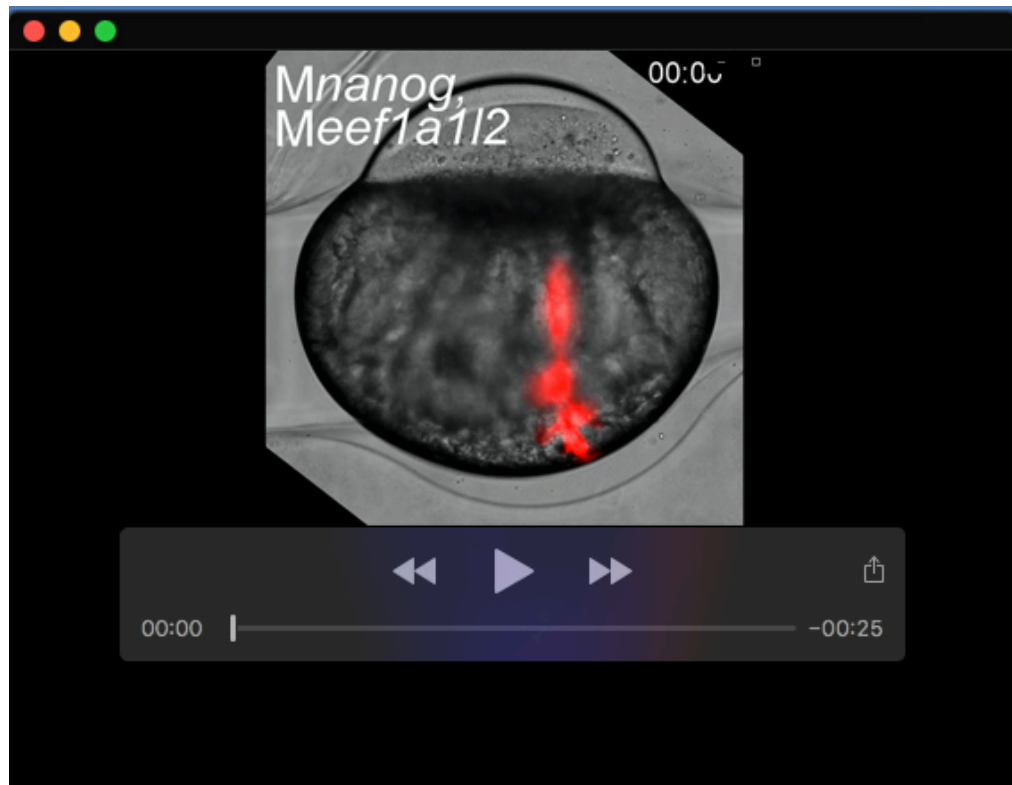

**Movie 3. Cytoplasmic movement in an *Mnanog,Meef1a1l2* embryo.** CM-Dil dye was injected at 20 mpf and embryos were imaged from 40 mpf to 60 mpf. The CM-Dil dye was continuously transported to the animal pole. 15 embryos were observed and this movie shows the representative result.
